# Supplementary material for: Reporting of Financial and Non-financial Conflicts of Interest in Systematic Reviews on Health Policy and Systems Research: A Cross Sectional Survey
Source: PubMed Central journal article supplement (PMC6077276; doi:10.15171/ijhpm.2017.146), 2018-02-12
Supplement: ijhpm-7-711-s003.pdf [file ijhpm-7-711-s003.pdf]

**Supplementary 3.** Characteristics of the reported individual financial conflicts of interest (COI) of systematic reviews (N=18)

|                                                                                                      | <b>Overall<br/>No. (%)</b> |
|------------------------------------------------------------------------------------------------------|----------------------------|
| Disclosures that specify the following characteristics of the individual financial COI:              |                            |
| <i>Source</i>                                                                                        | 16 (89%)                   |
| <i>Specify whether a source produces one of the interventions subject of the SR §</i>                | 0 (0%)                     |
| <i>Specify that a source produces interventions not subject of the SR but under the same field §</i> | 1 (6%) <sup>§</sup>        |
| <i>Monetary value</i>                                                                                | 0 (0%)                     |
| <i>Duration ¶</i>                                                                                    | 3 (17%)                    |
| <i>During conduct of the study</i>                                                                   | 3 (100%) <sup>¶</sup>      |
| <i>1 year</i>                                                                                        | 0 (0%)                     |
| <i>2 years</i>                                                                                       | 0 (0%)                     |
| <i>3 years</i>                                                                                       | 0 (0%)                     |
| <i>4 years</i>                                                                                       | 0 (0%)                     |
| <i>5 years</i>                                                                                       | 0 (0%)                     |
| <i>More than 5 years</i>                                                                             | 0 (0%)                     |

§ Calculated using N=16 as the denominator in the overall group. The disclosure included the following: “Prof Singh reports a British Lung Foundation grant for RCT of self-management support post admission.”

¶ Calculated using N=3 as the denominator in the overall.
